# Supplementary material for: Classification of zirconium-rich engineered and natural nano particles using single particle ICP-TOFMS
Source: Royal Society of Chemistry journal article supplement (doi:10.1039/d4ja00094c), 2024-01-01
Supplement: d4ja00094c1.pdf [file d4ja00094c1.pdf]

## Supplemental information for Classification of Zirconium-Rich Engineered and Natural Nano Particles using Single Particle ICP-TOFMS

Hark Karkee, Chloe Kyte and Alexander Gundlach-Graham\*

Department of Chemistry, Iowa State University, Ames, Iowa

\*Address correspondence: [alexgg@iastate.edu](mailto:alexgg@iastate.edu)

### Table of Contents

|                                                                                          |           |
|------------------------------------------------------------------------------------------|-----------|
| <b>Table S1</b> Instrumental parameters.....                                             | <b>S1</b> |
| <b>Table S2</b> Elements, isotopes, absolute sensitivities and critical mass.....        | <b>S2</b> |
| <b>Table S3</b> Mass fraction of each element in Zr-particles by spICP-TOFMS.....        | <b>S3</b> |
| <b>Figure S1</b> Boxplots showing mass distribution of Zr in sm and mm Zr-particles..... | <b>S3</b> |
| <b>Figure S2</b> Correlation matrix of element masses in Zr-nat particles .....          | <b>S4</b> |
| <b>Figure S3</b> Multi-elemental signatures of Zr-eng and Zr-nat particles.....          | <b>S4</b> |

Table S1. ICP-TOFMS instrument parameters

| <b>ICP Parameters</b>                          |                                                             |
|------------------------------------------------|-------------------------------------------------------------|
| Nebulizer gas                                  | 0.68 L min <sup>-1</sup>                                    |
| Auxillary gas                                  | 1.48 L min <sup>-1</sup>                                    |
| Cool gas                                       | 13 L min <sup>-1</sup>                                      |
| RF power                                       | 1550 W                                                      |
| Sampling depth                                 | 4.9 mm                                                      |
| Torch/Injector                                 | iCAP Q Quartz torch with 2.5 mm quartz injector             |
| Skimmer/sampler cone                           | iCAP Q Nickel Samples (X Series) with Skimmer (with insert) |
| <b>Mass Spectrometer Parameters</b>            |                                                             |
| Extraction Lens                                | -180 V                                                      |
| CCT mass                                       | 222 V                                                       |
| CCT Bias                                       | -1.7 V                                                      |
| Deflection entry                               | -29.8 V                                                     |
| Deflection exit                                | 35 V                                                        |
| CCT H <sub>2</sub> flow rate                   | 3.8 mL min <sup>-1</sup>                                    |
| Notch filter (m/z)                             | 19, 31.5, 37, 39.5                                          |
| Time resolution                                | 1.19 ms                                                     |
| Number of mass spectra averaged per time point | 99                                                          |

Table S2: Element names, measured Isotopes, sensitivities and critical masses obtained from spICP-TOFMS measurements

| Element Name | Isotopes Used                                                     | Sensitivity (TofCts/g) | $X_{C,sp}^{mass}$ (g) |
|--------------|-------------------------------------------------------------------|------------------------|-----------------------|
| Mg           | $^{24}\text{Mg}+^{25}\text{Mg}$                                   | 2.70E+15               | 2.89E-15              |
| Al           | $^{27}\text{Al}$                                                  | 8.93E+15               | 9.00E-16              |
| Ti           | $^{46}\text{Ti}$ or $^{48}\text{Ti}$                              | 5.39E+16               | 1.37E-16              |
| Mn           | $^{55}\text{Mn}$                                                  | 1.18E+17               | 7.14E-17              |
| Fe           | $^{56}\text{Fe}$                                                  | 1.17E+17               | 1.57E-16              |
| Y            | $^{89}\text{Y}$                                                   | 3.01E+17               | 2.07E-17              |
| Zr           | $^{90}\text{Zr}$                                                  | 1.70E+17               | 2.65E-17              |
| Nb           | $^{93}\text{Nb}$                                                  | 2.97E+17               | 2.39E-17              |
| Cs           | $^{133}\text{Cs}$                                                 | 3.45E+17               | 2.21E-17              |
| La           | $^{139}\text{La}$                                                 | 5.47E+17               | 1.03E-17              |
| Ce           | $^{140}\text{Ce}$                                                 | 5.35E+17               | 1.06E-17              |
| Ho           | $^{165}\text{Ho}$                                                 | 2.76E+17               | 1.92E-17              |
| Hf           | $^{177}\text{Hf}+^{178}\text{Hf}+^{179}\text{Hf}+^{180}\text{Hf}$ | 2.67E+17               | 1.49E-17              |
| Ta           | $^{181}\text{Ta}$                                                 | 5.22E+17               | 1.04E-17              |
| Pb           | $^{206}\text{Pb}+^{207}\text{Pb}+^{208}\text{Pb}$                 | 3.00E+17               | 1.84E-17              |
| Bi           | $^{209}\text{Bi}$                                                 | 2.55E+17               | 1.87E-17              |
| Th           | $^{232}\text{Th}$                                                 | 2.55E+17               | 1.76E-17              |
| U            | $^{238}\text{U}$                                                  | 2.83E+17               | 1.68E-17              |

Table S3: Mass fractions of each element in Zr-eng and Zr-nat particles. Mass fractions are calculated based on the total mass of each element present in Zr-eng and Zr-nat particles by spICP-TOFMS.

| Elements | Zr-eng           | Zr-nat              |
|----------|------------------|---------------------|
| Mg       | na               | $0.2 \pm 0.1\%$     |
| Al       | na               | $3.1 \pm 0.3\%$     |
| Ti       | na               | $0.1 \pm 0.1\%$     |
| Mn       | na               | $0.010 \pm 0.001\%$ |
| Fe       | na               | $18 \pm 2\%$        |
| Y        | na               | $0.8 \pm 0.4\%$     |
| Zr       | $98.2 \pm 0.1\%$ | $73 \pm 2\%$        |
| Sn       | na               | $0.03 \pm 0.01\%$   |
| La       | na               | $0.36 \pm 0.02\%$   |
| Ce       | na               | $0.70 \pm 0.09\%$   |
| Ho       | na               | $0.03 \pm 0.02\%$   |
| Hf       | $1.8 \pm 0.1\%$  | $0.78 \pm 0.02\%$   |
| Ta       | na               | $0.06 \pm 0.05\%$   |
| Pb       | na               | $0.030 \pm 0.003\%$ |
| Th       | na               | $3.4 \pm 0.1\%$     |
| U        | na               | $0.22 \pm 0.07\%$   |

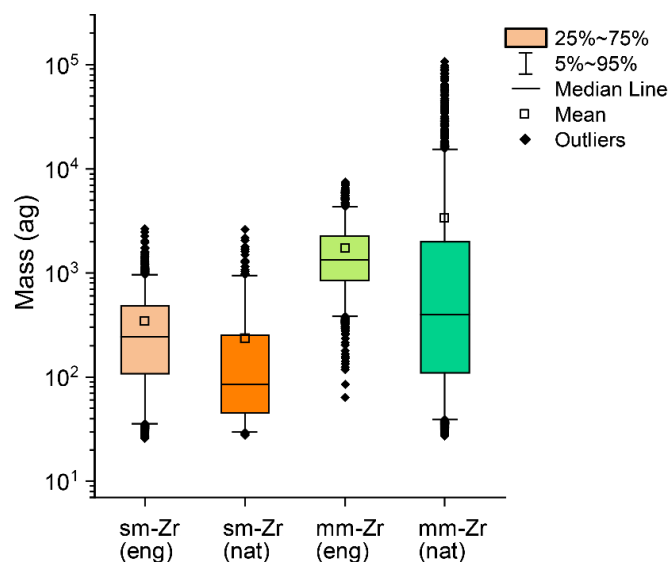

Figure S1: Boxplots showing mass distribution of Zr and Hf in single element (sm) and multi-element (mm) Zr-eng and Zr-nat particles.

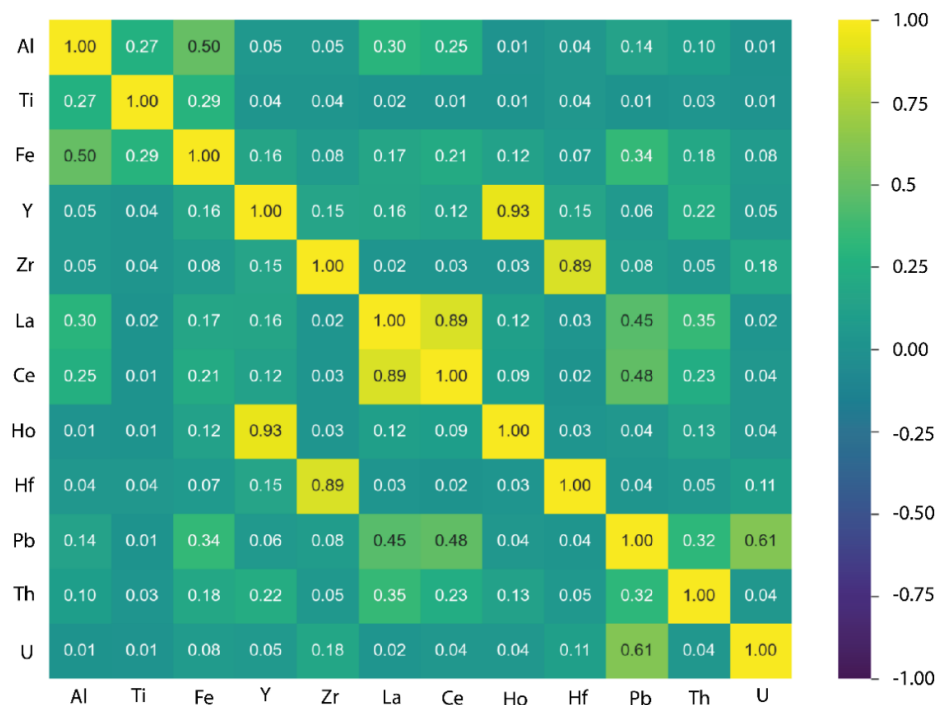

Figure S2: Correlation matrix of mass amounts of each element in Zr-nat particles. Correlation matrix is generated using Streamlit webapp based on Pearson correlation coefficient.

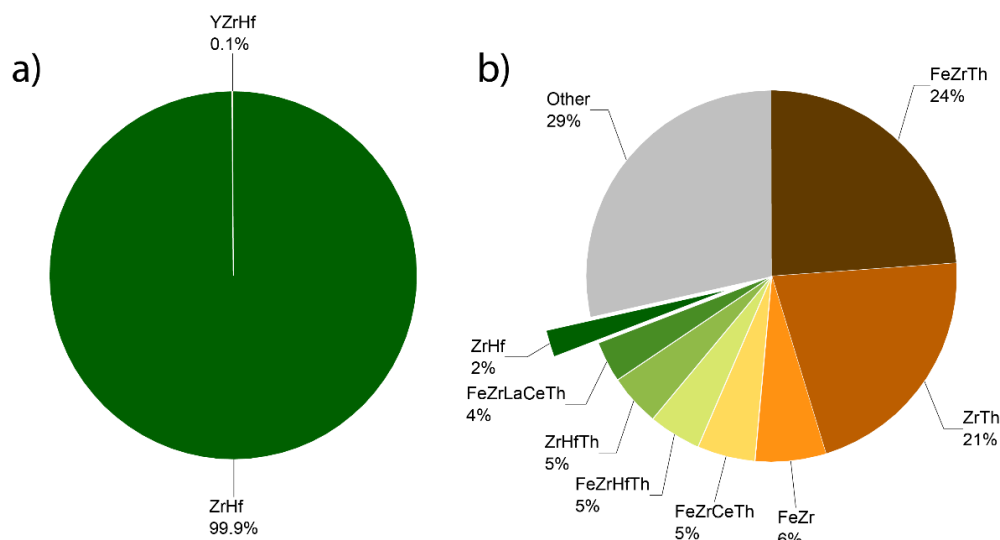

Figure S3: Pie charts of the multi-elemental signature measured by spICP-TOFMS for a) Zr-eng and b) Zr-nat particles. Only particles with recorded and multi-metal zirconium (mm-Zr) signatures are included in the pie charts.
